# **Inoculum origin, incubation temperature and mild hydrostatic pressure modulate growth and activity of anaerobic saline communities**

Vikuonuo Kraho<sup>\*a</sup>, Yi Liu<sup>a</sup>

<sup>a</sup>School of Environmental Science and Engineering, Hebei University of Science and Technology, Yuhua East Road 70#, Shijiazhuang City 050018, PR China

This manuscript has been removed owing to an apparent copyright violation
